# Supplementary material for: Therapeutic effects of tea polyphenol-loaded nanoparticles coated with platelet membranes on LPS-induced lung injury
Source: Royal Society of Chemistry journal article supplement (doi:10.1039/d3bm00802a), 2023-01-01
Supplement: d3bm00802a1.pdf [file d3bm00802a1.pdf]

## Supplemental Materials

### Therapeutic effects of Tea Polyphenols loaded nanoparticles coated with platelet membranes on LPS-induced lung injury

Hua Jin<sup>1,2\*</sup>, Yue Zhao<sup>1,2</sup>, Yinlian Yao<sup>2</sup>, Jin Zhao<sup>2</sup>, Renxing Luo<sup>1,3</sup>, Shilong Fan<sup>2</sup>, Yanlan Wei<sup>2</sup>, Suidong Ouyang<sup>1</sup>, Wanqing Peng<sup>2</sup>, Yumin Zhang<sup>2</sup>, Jiang Pi<sup>3</sup>, Gonghua Huang<sup>1\*</sup>

1. Guangdong Provincial Key Laboratory of Medical Molecular Diagnostics, The First Dongguan Affiliated Hospital, Guangdong Medical University, Dongguan, China 523808

2. School of Pharmacy, Guangdong Medical University, Dongguan, China 523808

3. School of Medical Technology, Guangdong Medical University, Dongguan, China 523808

#### Corresponding Author:

Hua Jin: jinhua0413@gdmu.edu.cn

Gonghua Huang: gonghua.huang@gdmu.edu.cn

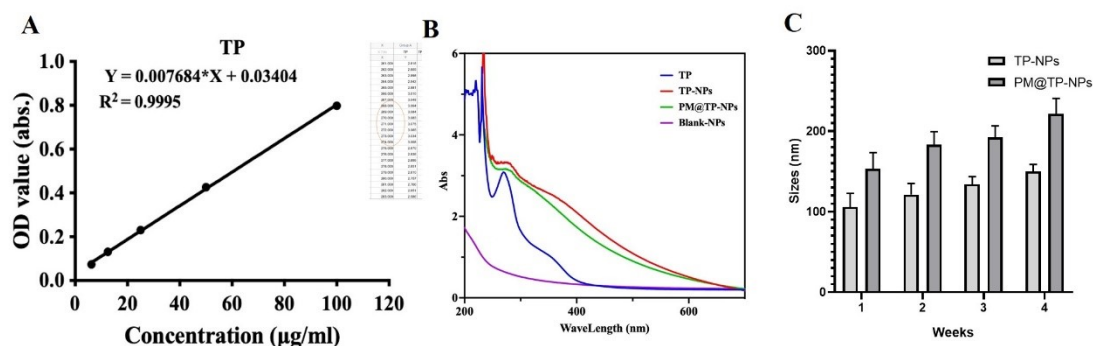

**Figure S1** The assay of TP loading onto TP-NPs. (A) The standard curve of tea polyphenol (TP) at 220 nm. The UV absorbance peak is at ~270 nm. (B) The UV-vis spectrum of free TP, TP-NPs and PM@TP-NPs indicated that TP was successfully encapsulated in TP-NPs and PM@TP-NPs, which were shown by the similar absorption peaks at around 220 nm. (C) The diameters of the two kinds of TP-NPs did not change significantly for up to 4 weeks of storage at 4°C.

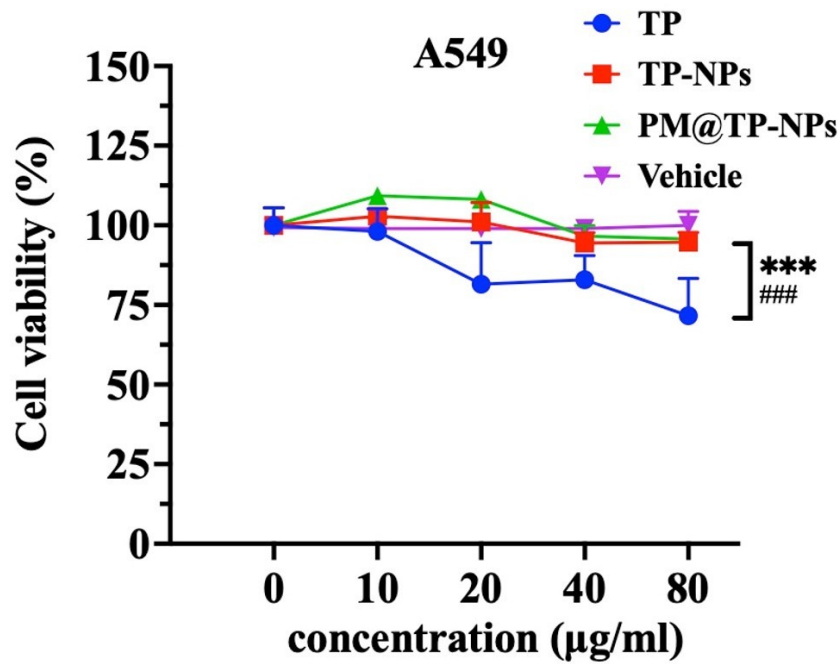

**Figure S2 Effect of TP on the cell viability of A549 cells.** A549 cells were incubated for 24 h in the presence of free TP or TP-NPs (final concentration 10, 20, 40, 80 µg/ml). The cell viability was assayed by Cell Counting Kit-8 (CCK-8). The results showed that TP or TP-NPs would not induce cytotoxicity in A549 cells at low concentration (<40ug/ml). Notably, high concentration (80 µg/ml ) of TP could induce growth inhibition on cells, however, the same concentration of TP-NPs had no toxic effects on cells. It implied that nanoparticle-formulation could effectively decrease the cytotoxicity induced by high dose of TP. (\*\*\*\* p < 0.001)

A549 cells were provided by the Cell Library of Guangdong Provincial Key Laboratory of Medical Molecular Diagnostics, Guangdong Medical University. A549 cells were cultured in DMEM (Gibco) with 10% fetal bovine serum (Gibco) containing 100 µg/ml streptomycin and 100 IU/ml penicillin at 5% CO<sub>2</sub> and 37 °C.
